# Supplementary material
Source: publisher figshare collection journal article supplement (https://acs.figshare.com/ndownloader/files/4675393)
Supplement: Supplementary file 1 [file 4675393]

Voltammetric, Spectroscopic and Microscopic Investigations of Electrocrystallized forms of Semi-conducting, AgTCNQ (TCNQ=7,7,8,8-tetracyanoquinodimethane) Exhibiting Different Morphologies and Colors

Alexander R. Harris, Ayman Nafady<sup>†</sup>, Anthony P. O'Mullane, Alan M. Bond<sup>z</sup>

School of Chemistry, Monash University, Clayton, Victoria, 3800, Australia

*Keywords: Electrocrystallization, AgTCNQ, morphology, nucleation-growth, voltammetry.*

<sup>†</sup>Permanent Address: Chemistry Department, Faculty of Science, Sohag University, Sohag, Egypt.

<sup>z</sup>alan.bond@sci.monash.edu.au

## Supporting Information

Figures S1-S4: Raman and IR spectra and powder XRD of chemically synthesised AgTCNQ (Figure S1). Cyclic voltammetry at a gold electrode in acetonitrile (Figure S2) and at a chemically modified electrode in water (Figure S3). Optical microscopy of electrochemically synthesized AgTCNQ (Figure S4).

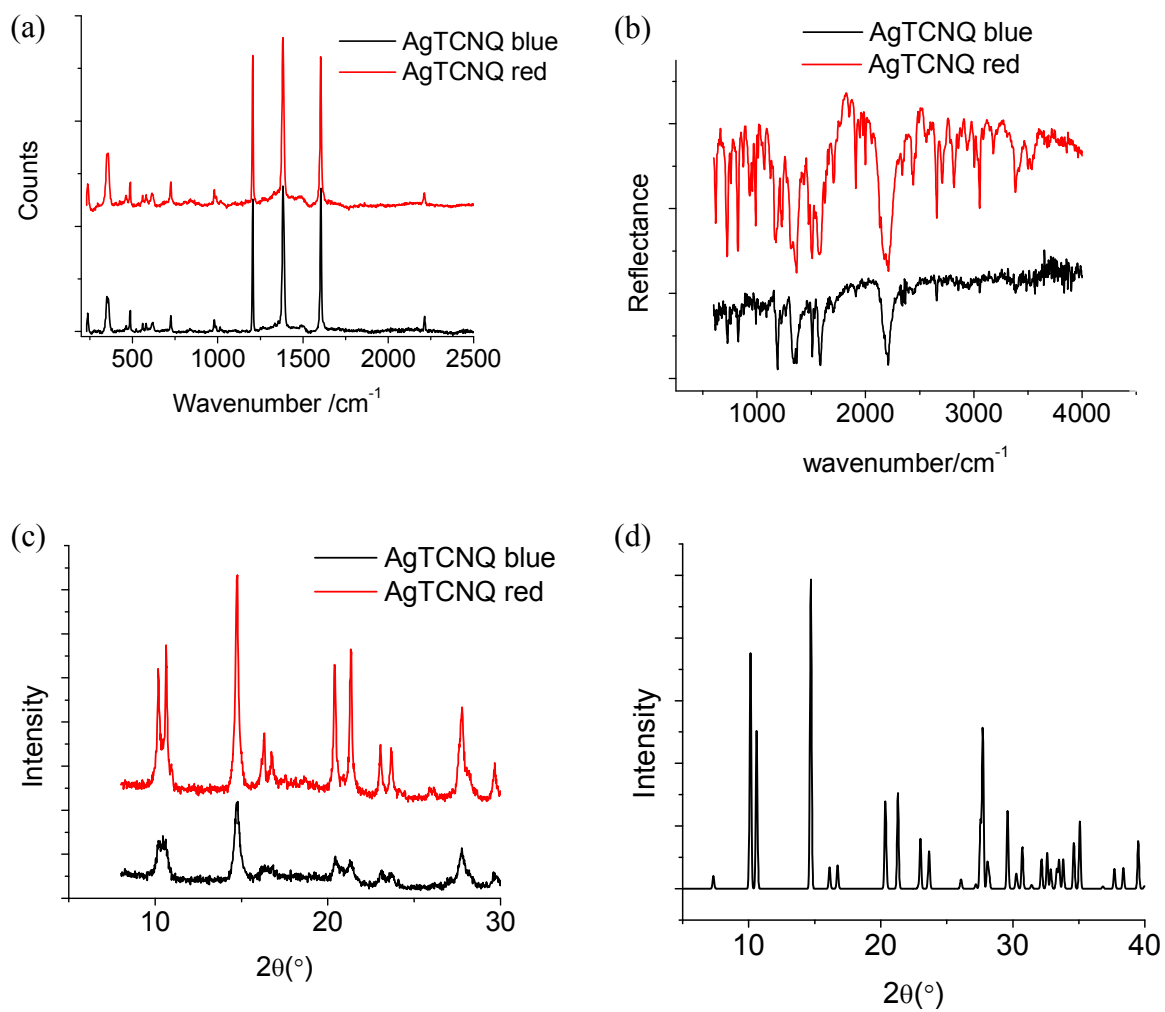

Figure S1: (a) Raman spectroscopy, (b) infrared spectroscopy and (c) powder XRD from chemically synthesized AgTCNQ blue and red forms according to reference 20 and (d) powder XRD calculated from single crystal data from reference 17.

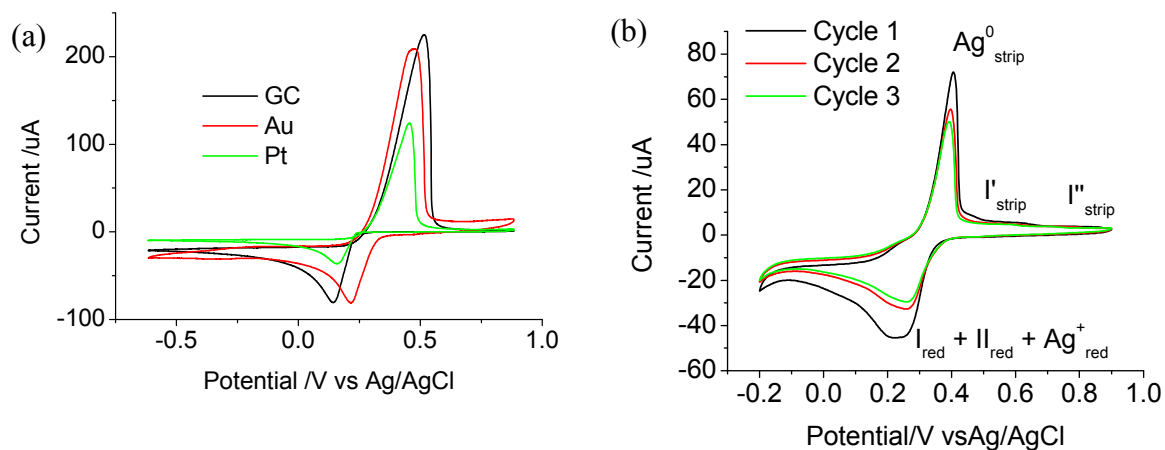

Figure S2: Cyclic voltammetry in acetonitrile (0.1 M  $Bu_4NBF_4$ ) (a) second cycles of potential at a scan rate of  $100 \text{ mV s}^{-1}$  for 10 mM  $Ag^+_{(MeCN)}$  at 1.5 mm diameter GC, 1.5 mm diameter gold and 1 mm diameter platinum electrodes and (b) potential cycles 1, 2 and 3 for equi-molar 9.1 mM  $TCNQ_{(MeCN)}$  and  $Ag^+_{(MeCN)}$  at a 1.5 mm diameter gold electrode using a scan rate of  $20 \text{ mV s}^{-1}$ .

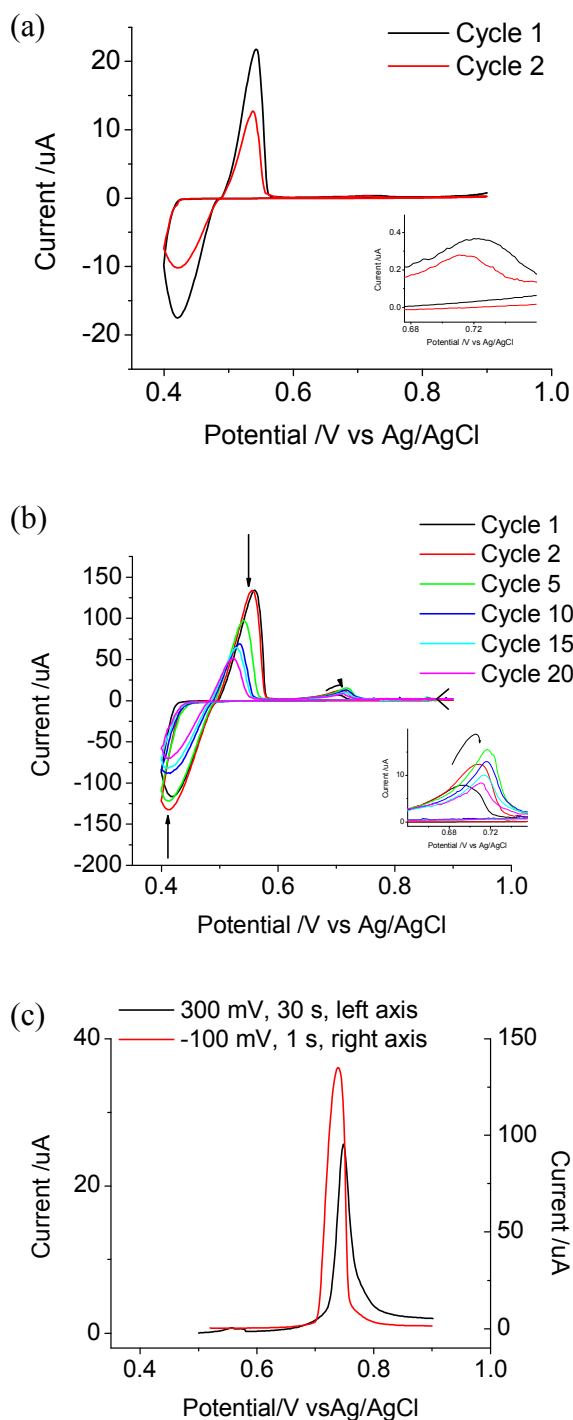

Figure S3: Cyclic voltammograms obtained in water (0.1 AgNO<sub>3(aq)</sub>) at a 3 mm diameter GC electrode at a scan rate of 20 mV s<sup>-1</sup> from (a) a drop cast TCNQ<sub>(s)</sub>-modified electrode (b) a mechanically attached TCNQ<sub>(s)</sub>-modified electrode (c) a modified electrode consisting of electrocrystallized AgTCNQ obtained from equi-molar 9.1 mM TCNQ<sub>(MeCN)</sub> and Ag<sup>+</sup><sub>(MeCN)</sub> in acetonitrile (0.1 M Bu<sub>4</sub>NBF<sub>4</sub>) when the potential is held for 30 s at 300 mV or 1 s at -100 mV.

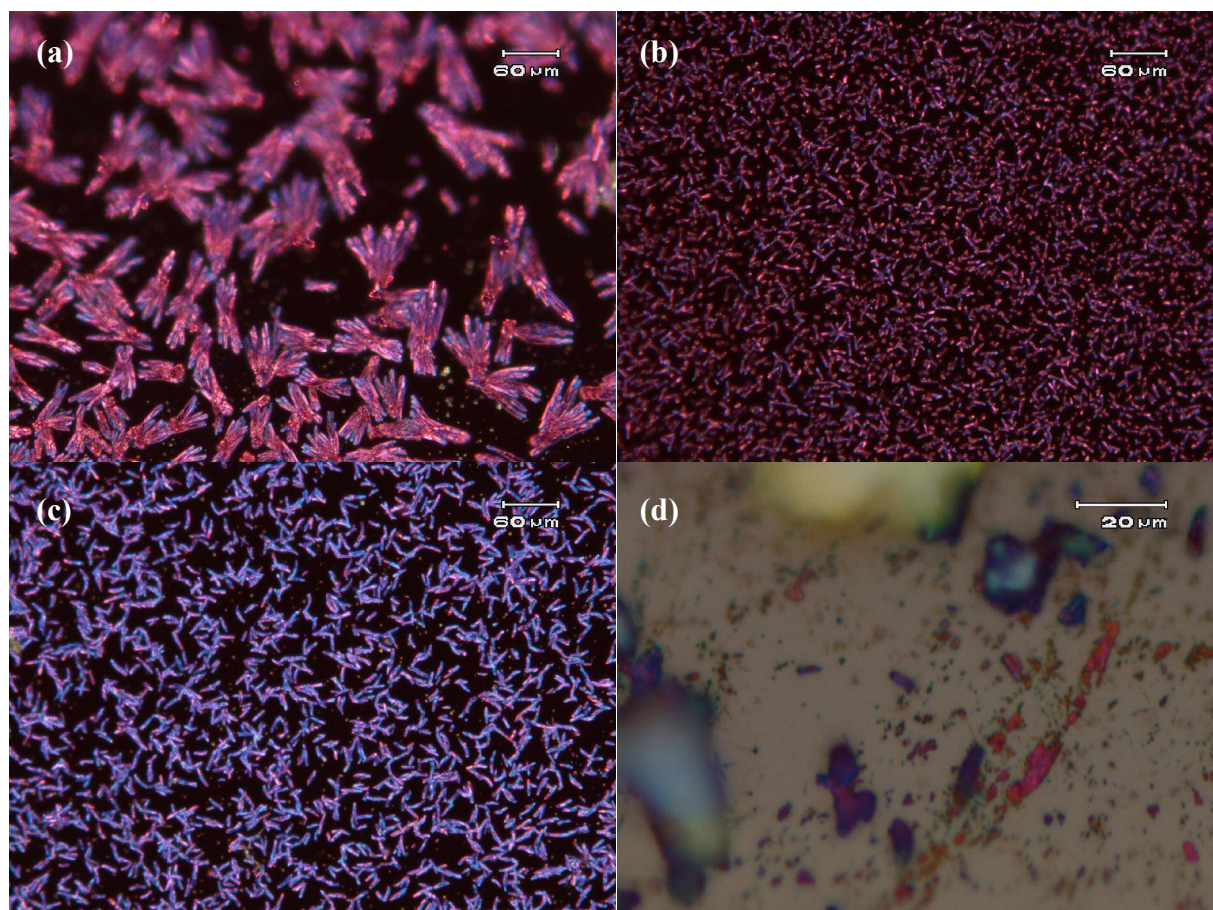

Figure S4: Optical microscopy of AgTCNQ generated as follows on a 3 mm diameter GC electrode (a)  $\text{Ag}_{(\text{metal})}$  deposited from 10 mM  $\text{Ag}^+_{(\text{MeCN})}$  in acetonitrile (0.1 M  $\text{Bu}_4\text{NBF}_4$ ) at  $-100$  mV for 10 s, rinsed in acetonitrile and placed in 10 mM  $\text{TCNQ}_{(\text{MeCN})}$  for a further 60 s. (b-c) Electrocrystallized from equi-molar 9.1 mM  $\text{TCNQ}_{(\text{MeCN})}$  and  $\text{Ag}^+_{(\text{MeCN})}$  in acetonitrile (0.1 M  $\text{Bu}_4\text{NBF}_4$ ) by (b) linear sweep voltammetry over the potential range of 1.1 V to 0 V and (c) cyclic voltammetry from 1.1 V to  $-300$  mV at a scan rate of  $100 \text{ mV s}^{-1}$ . (d) in 0.1 M  $\text{AgNO}_{3(\text{aq})}$  via linear sweep voltammetry from 900 to 400 mV at a scan rate of  $20 \text{ mV s}^{-1}$  of mechanically adhered  $\text{TCNQ}_{(\text{s})}$ .
